# Supplementary material for: Two-photon fluorescence imaging of mitochondrial viscosity with water-soluble pyridinium inner salts
Source: Royal Society of Chemistry journal article supplement (doi:10.1039/d1nj05020f), 2021-12-16
Supplement: d1nj05020f1.pdf [file d1nj05020f1.pdf]

## Supplementary Information

### **Two-photon fluorescence imaging of mitochondria viscosity with water-soluble pyridinium inner salts**

Bin Fang,<sup>‡a,b</sup> Beilin Zhang,<sup>‡a,b</sup> Rongxiu Zhai, Limin Wang,<sup>b</sup> Yang Ding,<sup>b</sup> Huizi Li,<sup>d</sup> Hua Bai,<sup>\*b</sup>  
Zhenhua Wang,<sup>\*b</sup> Bo Peng,<sup>b</sup> Lin Li,<sup>b,c</sup> Li Fu<sup>\*a</sup>

---

<sup>a</sup>School of Materials Science and Engineering, Northwestern Polytechnical University, Xi'an 710072, Shaanxi, P. R. China. E-mail: [fuli@nwpu.edu.cn](mailto:fuli@nwpu.edu.cn)

<sup>b</sup>Frontiers Science Center for Flexible Electronics (FSCFE), Shaanxi Institute of Flexible Electronics (SIFE) & Shaanxi Institute of Biomedical Materials and Engineering (SIBME), Northwestern Polytechnical University (NPU), 127 West Youyi Road, Xi'an 710072, P. R. China. E-mail: [iamhbai@nwpu.edu.cn](mailto:iamhbai@nwpu.edu.cn); [iamzhuang@nwpu.edu.cn](mailto:iamzhuang@nwpu.edu.cn)

<sup>c</sup>The Institute of Flexible Electronics (IFE, Future Technologies), Xiamen University, Xiamen 361005, Fujian, P. R. China

<sup>d</sup>Department of Outpatient, PLA Rocket Force Characteristic Medical Center, 16 Xinwai Avenue, Beijing100088, P. R. China.

<sup>‡</sup>These authors contributed equally to this work.

## Supplemental Figures and Tables

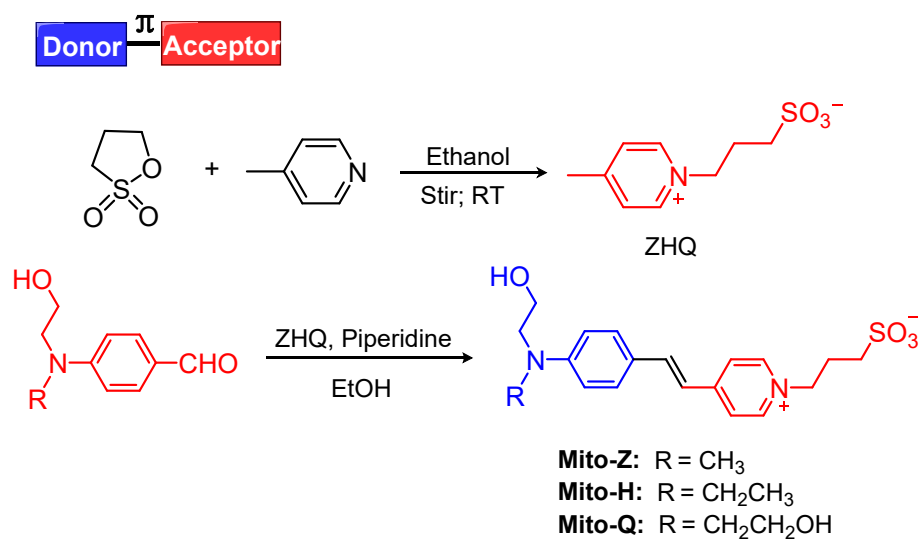

**Scheme S1.** The synthesis routes of target compounds.

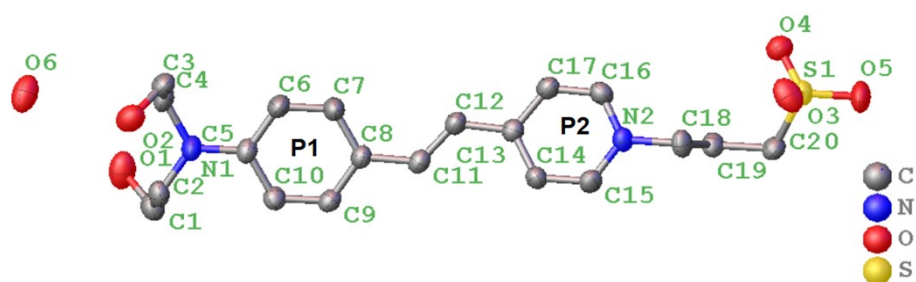

**Figure S0.** Crystal structures of **Mito-Q**. All H atoms are omitted for clarity.

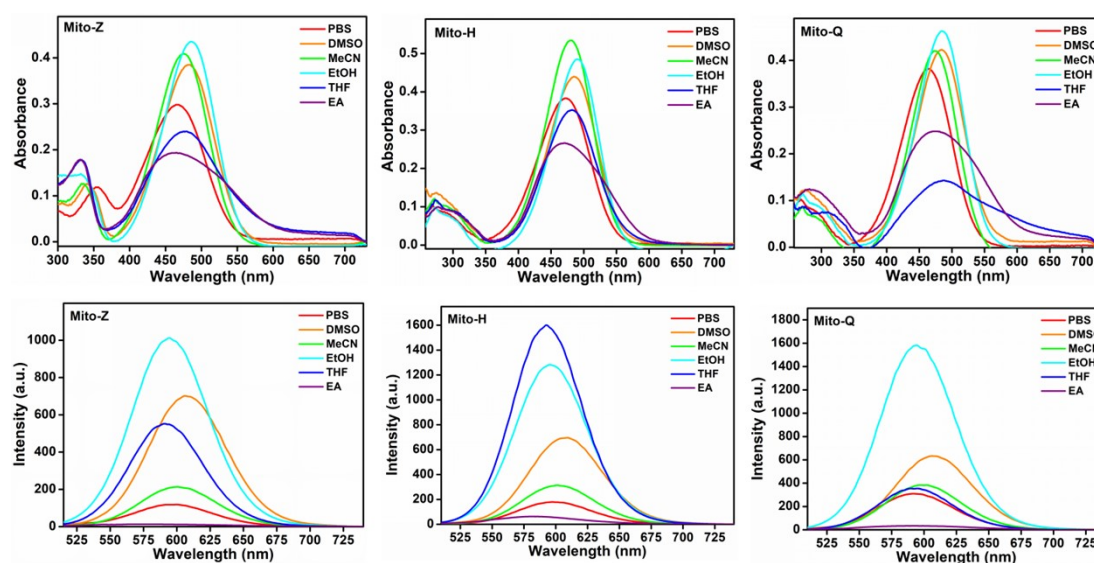

**Figure S1.** The linear absorption and emission spectra upon excited at 466 nm, 472 nm, 464 nm of **Mito-Z**, **Mito-H**, **Mito-Q** in different solvents with different polarities with a concentration of 10  $\mu\text{M}$ . □

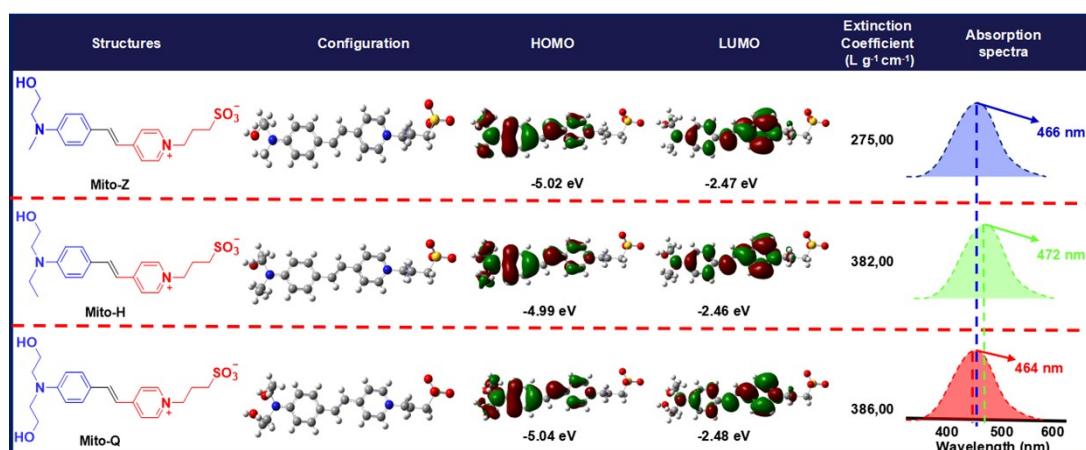

**Figure S2.** Frontier molecular orbitals of the sensors (HOMO-LUMO energy levels were determined from DFT optimized geometries). The probes were calculated with time-dependent density functional theory (TD-DFT) at the B3LYP/6-31G(d,p) level using Gaussian 09.

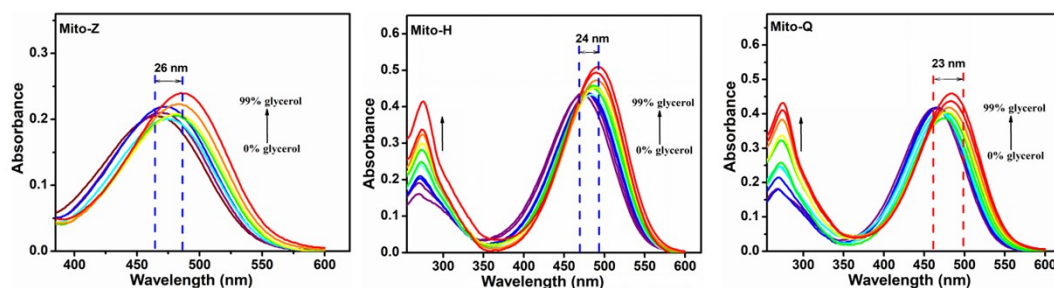

**Figure S3.** Changes of absorption spectra with variation of solution viscosity in a water-glycerol system. (1) water (2) water/glycerol (9 : 1, v/v), (3) water/glycerol (8 : 2, v/v), (4) water/glycerol (7 : 3, v/v), (5) water/glycerol (6 : 4, v/v) (6) water/glycerol (5 : 5, v/v), (7) water/glycerol (4 : 6, v/v), (8) water/glycerol (3 : 7, v/v), (9) water/glycerol (2 : 8, v/v), (10) water/glycerol (1 : 9, v/v), and (11) 99% glycerol.

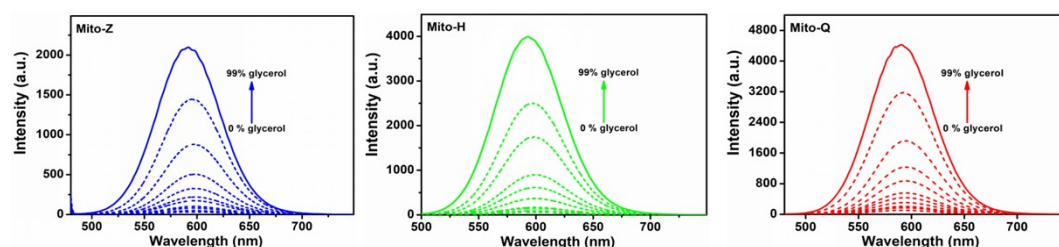

**Figure S4.** Changes of fluorescence spectra with variation of solution viscosity in water-glycerol media of the sensors with increasing solution viscosity: (1) water (2) water/glycerol (9 : 1, v/v), (3) water/glycerol (8 : 2, v/v), (4) water/glycerol (7 : 3, v/v), (5) water/glycerol (6 : 4, v/v) (6) water/glycerol (5 : 5, v/v), (7) water/glycerol (4 : 6, v/v), (8) water/glycerol (3 : 7, v/v), (9) water/glycerol (2 : 8, v/v), (10) water/glycerol (1 : 9, v/v), and (11) 99% glycerol.

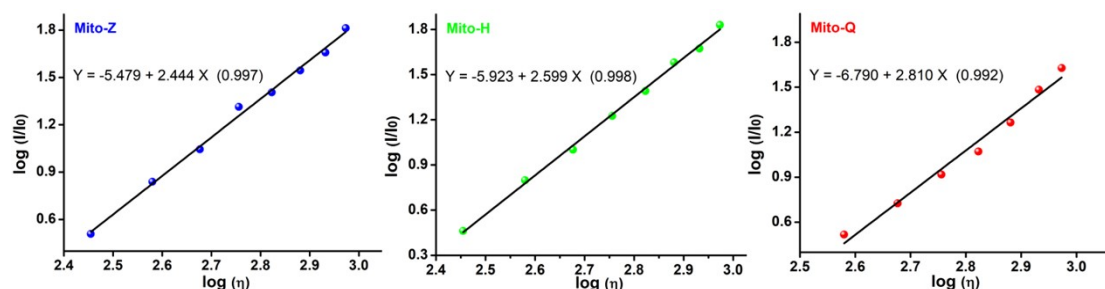

**Figure S5.** (A) The linear relationship of fluorescence intensity of compound **Mito-Q** with different viscosity.  $I$  and  $I_0$  represent the fluorescence intensities of **Mito-Q** in glycerol/water mixture and water, respectively (water/glycerol = 80:20, 70:30, 60:40, 50:50, 20:80, 10:90, 1:99).

| Fluo. intensities at 595 nm (Mito-Z) |       | $\sigma$ (Fluo.) | Fluo. intensities at 595 nm (Mito-H) |       | $\sigma$ (Fluo.) | Fluo. intensities at 595 nm (Mito-Q) |       | $\sigma$ (Fluo.) |
|--------------------------------------|-------|------------------|--------------------------------------|-------|------------------|--------------------------------------|-------|------------------|
| 31.46                                | 31.56 | 0.764            | 58.85                                | 58.95 | 0.782            | 104.1                                | 102.3 | 0.732            |
| 31.23                                | 34.01 |                  | 58.26                                | 58.01 |                  | 105.2                                | 104.6 |                  |
| 33.11                                | 33.16 |                  | 58.97                                | 59.16 |                  | 104.8                                | 105.1 |                  |
| 32.45                                | 32.58 |                  | 60.12                                | 60.32 |                  | 105.3                                | 105.1 |                  |
| 33.56                                | 33.46 |                  | 59.85                                | 60.06 |                  | 105.5                                | 104.8 |                  |
| 32.98                                | 32.12 |                  | 60.22                                | 59.65 |                  | 104.9                                | 105.2 |                  |
| 32.45                                | 33.25 |                  | 58.34                                | 59.39 |                  | 104.6                                | 104.9 |                  |
| 32.68                                | 32.96 |                  | 58.19                                | 60.23 |                  | 104.9                                | 105.1 |                  |

**Figure S6.** Multi-recorded fluorescence spectra of blank measurement. Insert: the data of standard deviation ( $\sigma$ ) of blank measurement from fluorescence spectra.

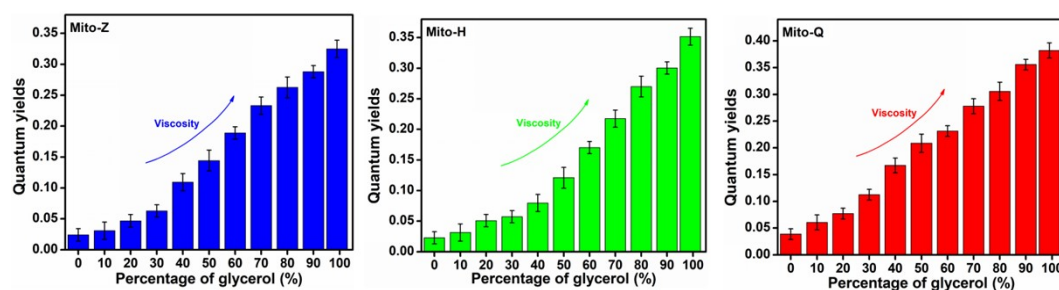

**Figure S7.** The percentage of fluorescence quantum yields of the sensors with increasing solution viscosity: (1) water (2) water/glycerol (9 : 1, v/v), (3) water/glycerol (8 : 2, v/v), (4) water/glycerol (7 : 3, v/v), (5) water/glycerol (6 : 4, v/v) (6) water/glycerol (5 : 5, v/v), (7) water/glycerol (4 : 6, v/v), (8) water/glycerol (3 : 7, v/v), (9) water/glycerol (2 : 8, v/v), (10) water/glycerol (1 : 9, v/v), and (11) 99% glycerol.

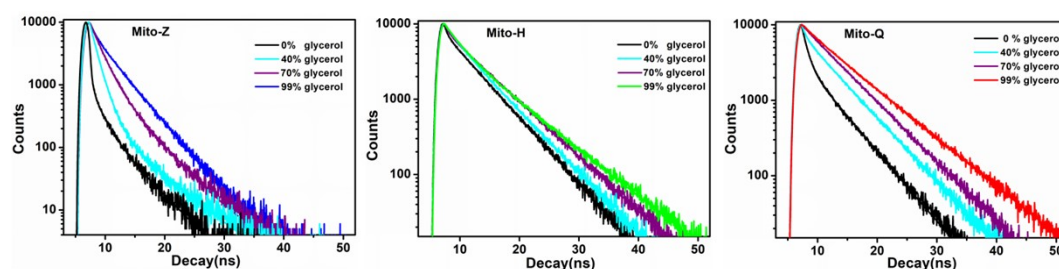

**Figure S8.** Fluorescence lifetimes of the sensors in different viscosity media. (1) water, (2) water/glycerol (6 : 4, v/v), (3) water/glycerol (3 : 7, v/v), (4) 99% glycerol.

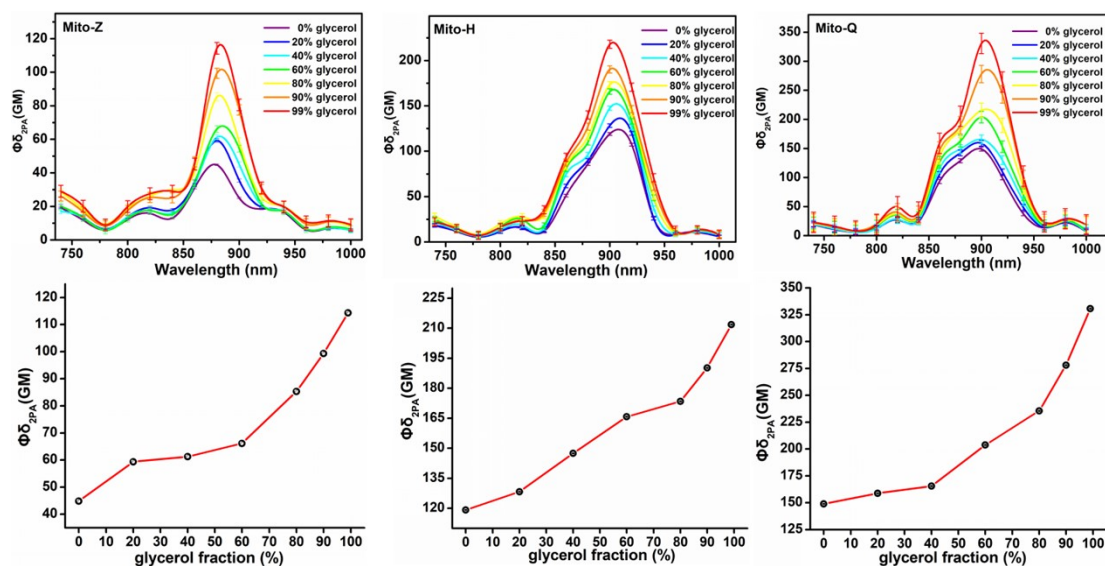

**Figure S9.** Two-photon (TP) action cross-section spectra of the sensors with variation of solution viscosity in the wavelength region of 740-1000 nm. And TP action cross-section spectra of the sensors with variation of solution viscosity at 880nm, 900 nm, 900 nm.

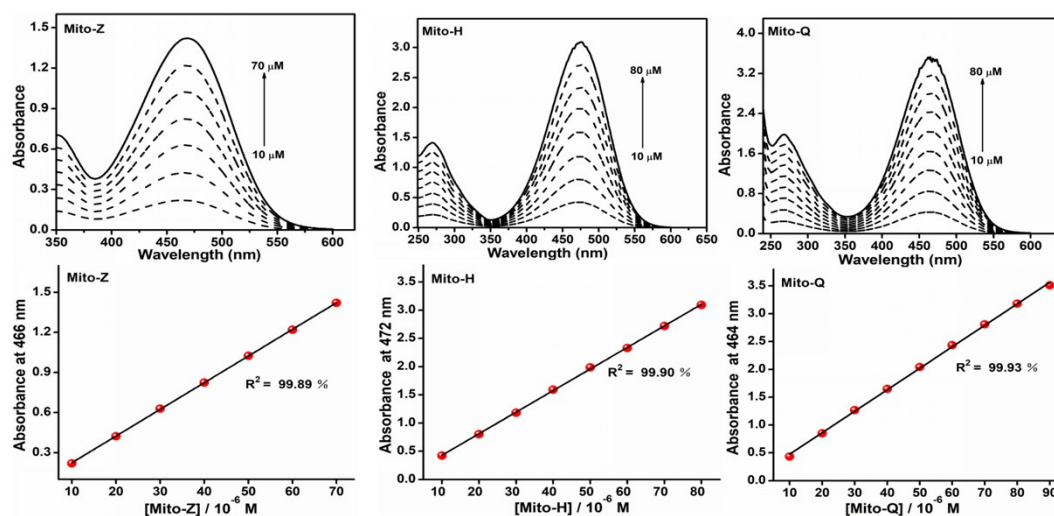

**Figure S10.** Absorption spectra and plot of intensity against the concentration of the sensors in pure PBS buffer (pH = 7.4), respectively.

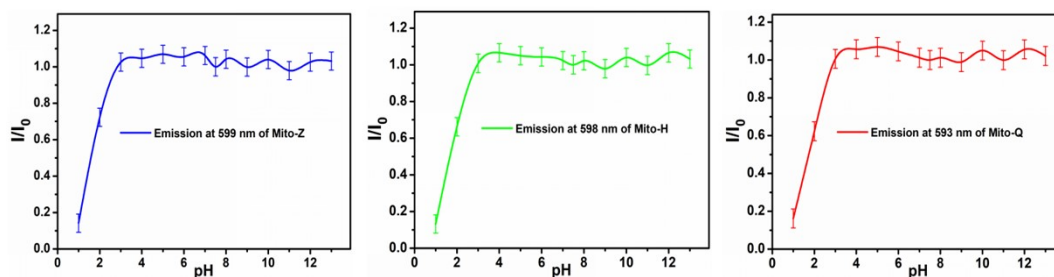

**Figure S11.** The changes of emission intensity of the sensors (10  $\mu\text{M}$ ) in PBS-buffer (10 mM) at various pH. ( $I_0$  is the emission intensity with pH at 7.40 and  $I$  represent the emission intensity at other pH values).

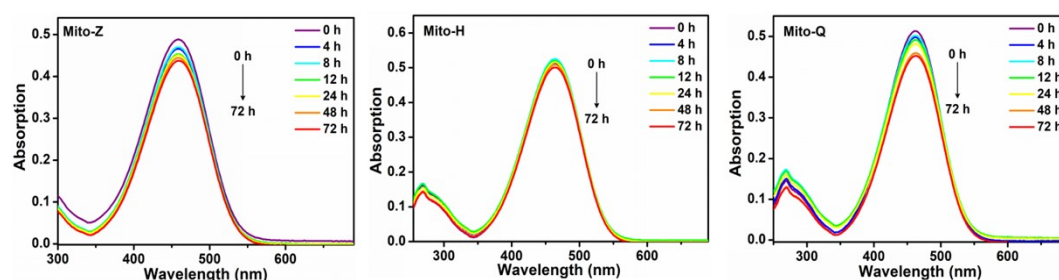

**Figure S12.** Time evolution of UV-vis absorption spectra of the targeting compounds in PBS buffers (pH = 7.40).

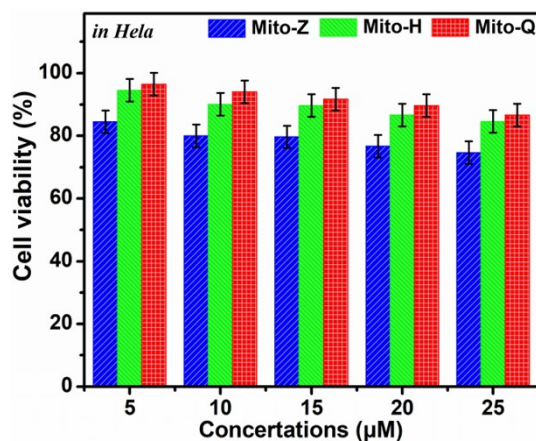

**Figure S13.** MTT assay of HepG2 cells treated with the sensors at different concentrations for 24 h.

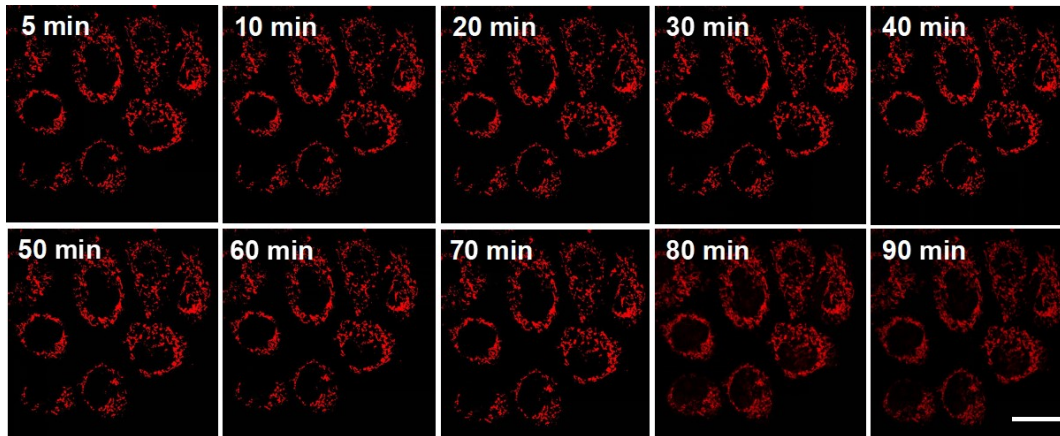

**Figure S14.** Real time monitoring images under OP fluorescence microscopy using **Mito-Q** (1 uM). Scale bar =20  $\mu$ m

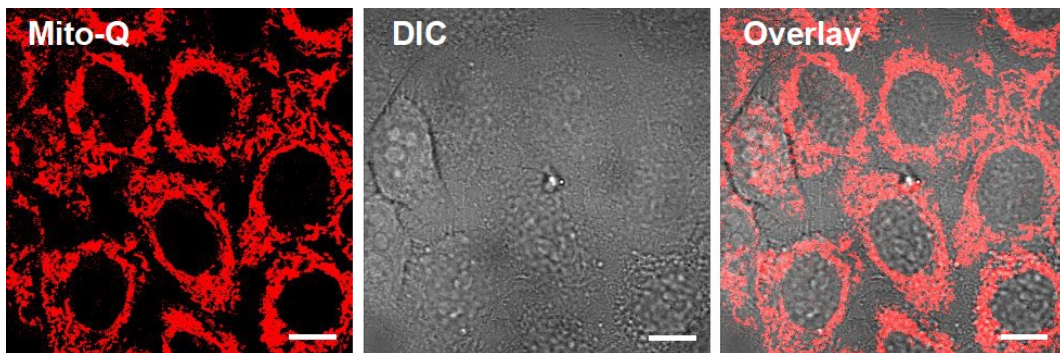

**Figure S15.** One-photon confocal laser fluorescence microscopy images of HepG2 cells treated with **Mito-Q** (10  $\mu$ M). Scale bar =20  $\mu$ m



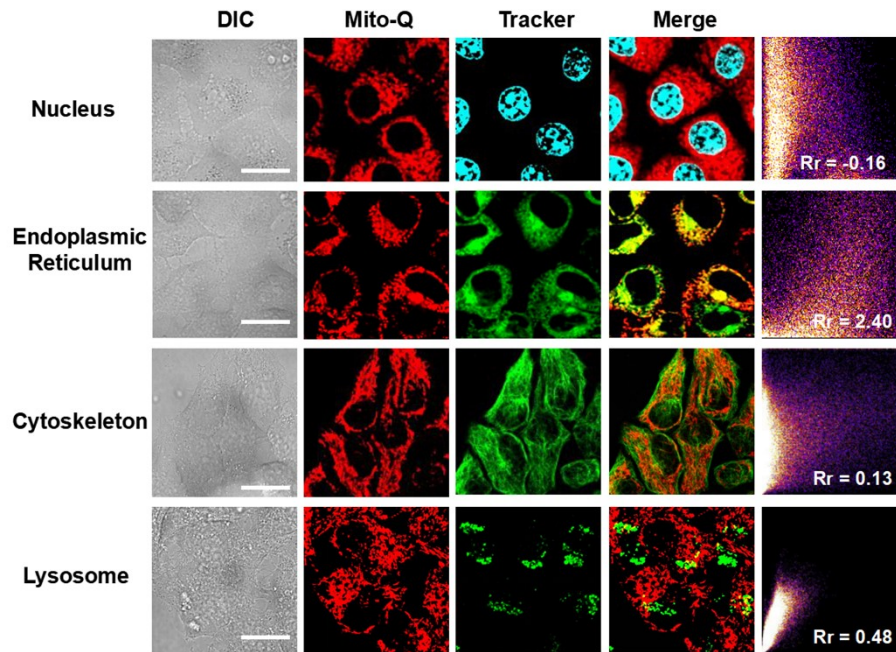

**Figure S16.** Determination of intercellular localization of Mito-Q by confocal microscopy. HeLa cells were incubated with Mito-Q for 30 min, and then co-incubated with Nuc-red for 15 min, ER tracker for 30 min, Sir-tubulin for 30 min and lysotracker for 30 min, respectively. The scale bars represent 20  $\mu\text{m}$ .

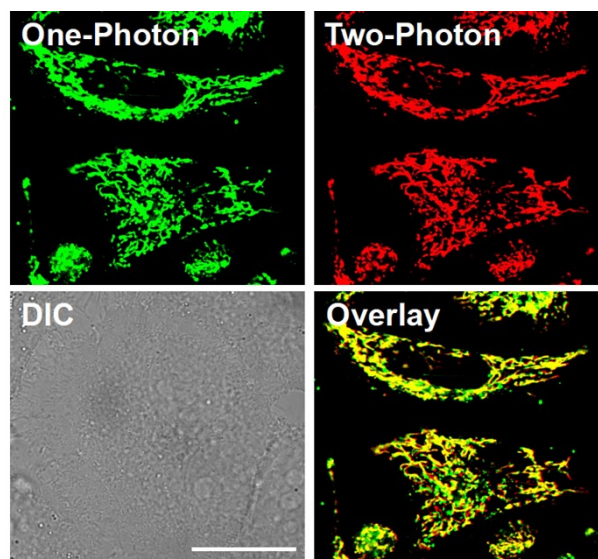

**Figure S17.** One- and two-photon fluorescence images of living HeLa cells incubated with Mito-Q (10  $\mu\text{M}$ ) for 30 min. Scale bar =20  $\mu\text{m}$ .

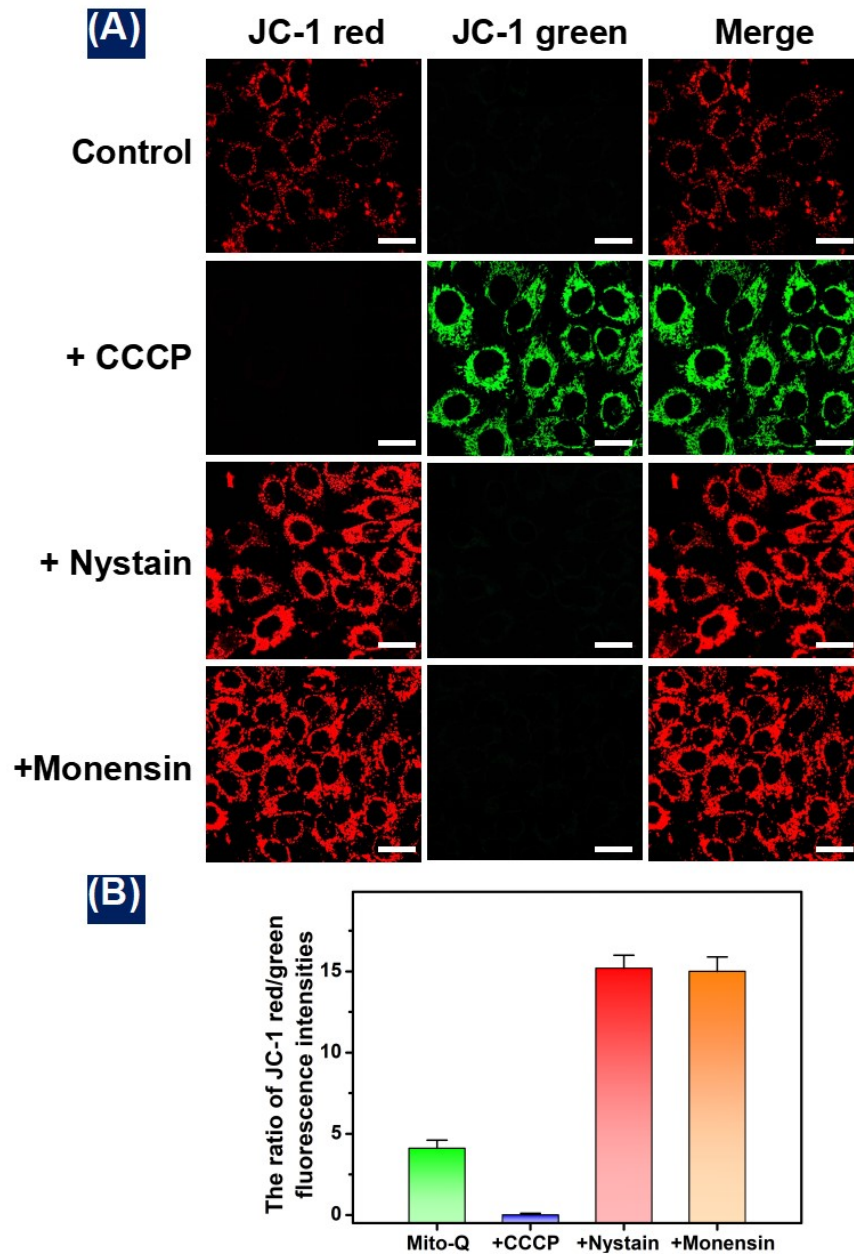

**Figure 18.** Mitochondrial membrane potential (MMP) changes in Hela cells with treatment by (-), CCCP (+), nystatin (+) and monensin (+), respectively. Scale bar = 20  $\mu$ m. (B) Histogram of the changes in the mitochondrial membrane potential in Hela cell treated with (-), CCCP (+), nystatin (+) and monensin (+), respectively. Data reference is the mean of three replicate  $\pm$  SD.

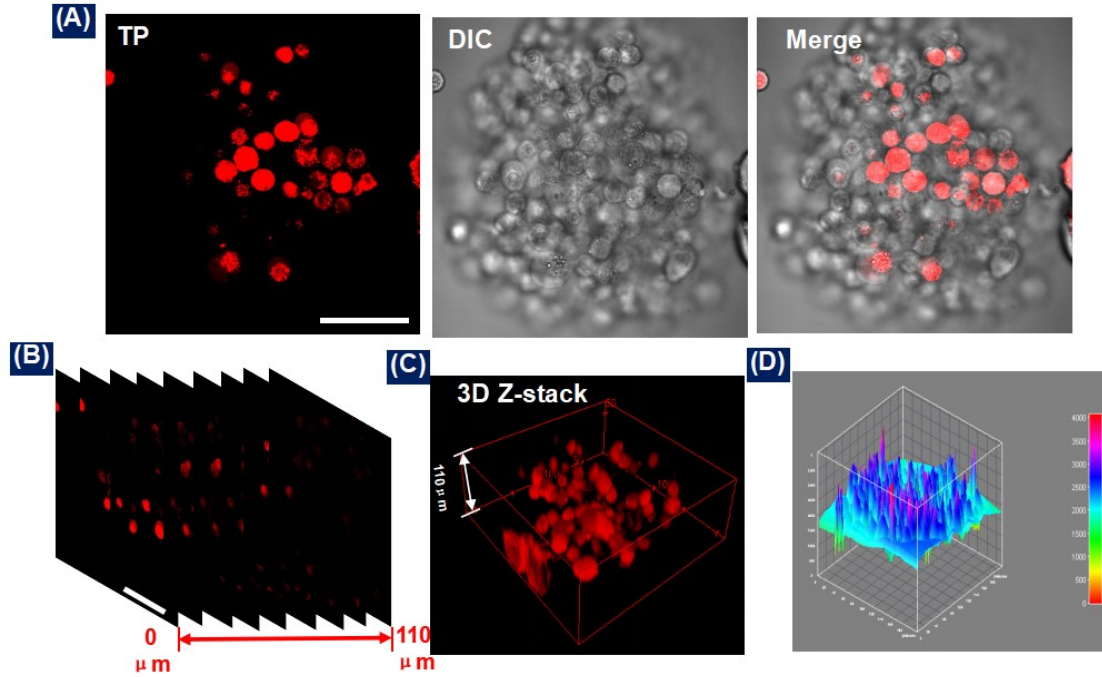

**Figure S19.** (A) TP fluorescence images of the 3D multicellular spheroids of HepG2 cells incubated with 10  $\mu\text{M}$  **Mito-Q**, 30 min. (B) The TP Z-stack images were taken for 0-110  $\mu\text{m}$ . (C) The TP 3D Z-stack images of an intact spheroid; (bottom),  $\lambda_{\text{em}} = 550\text{-}630\text{ nm}$  and  $\lambda_{\text{ex}} = 900\text{ nm}$ . (D) 3D fluorescent intensity with **Mito-Q**.

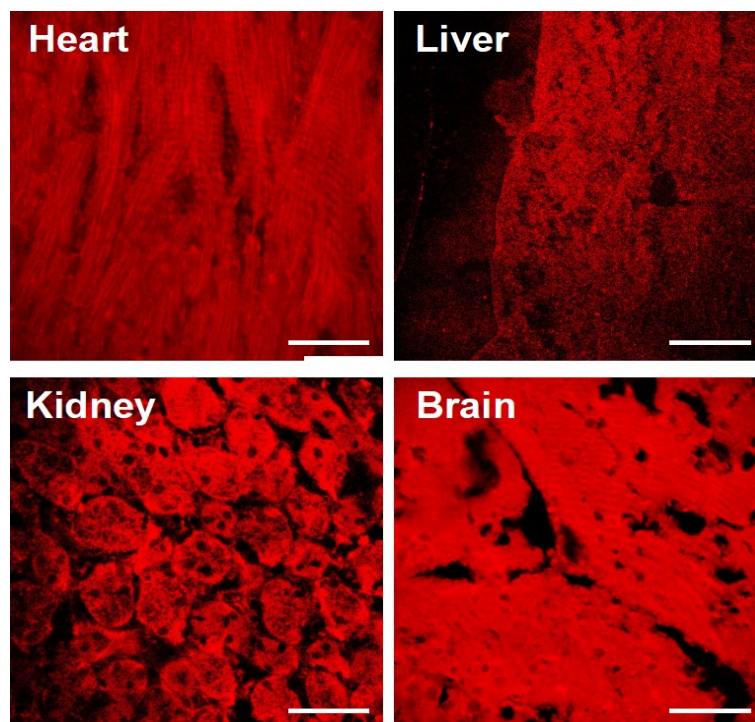

**Figure S20.** Fresh Tissue sections from brain, liver, spleen and heart (10  $\mu\text{m}$ ) incubated with probe **Mito-Q** for 30 min, Scale bar = 100  $\mu\text{m}$ .

## Characterization spectra

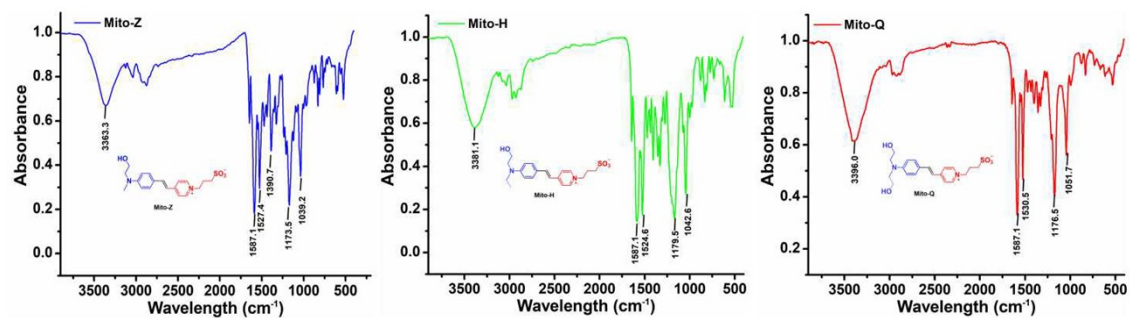

Figure S21. IR spectra of the probes.

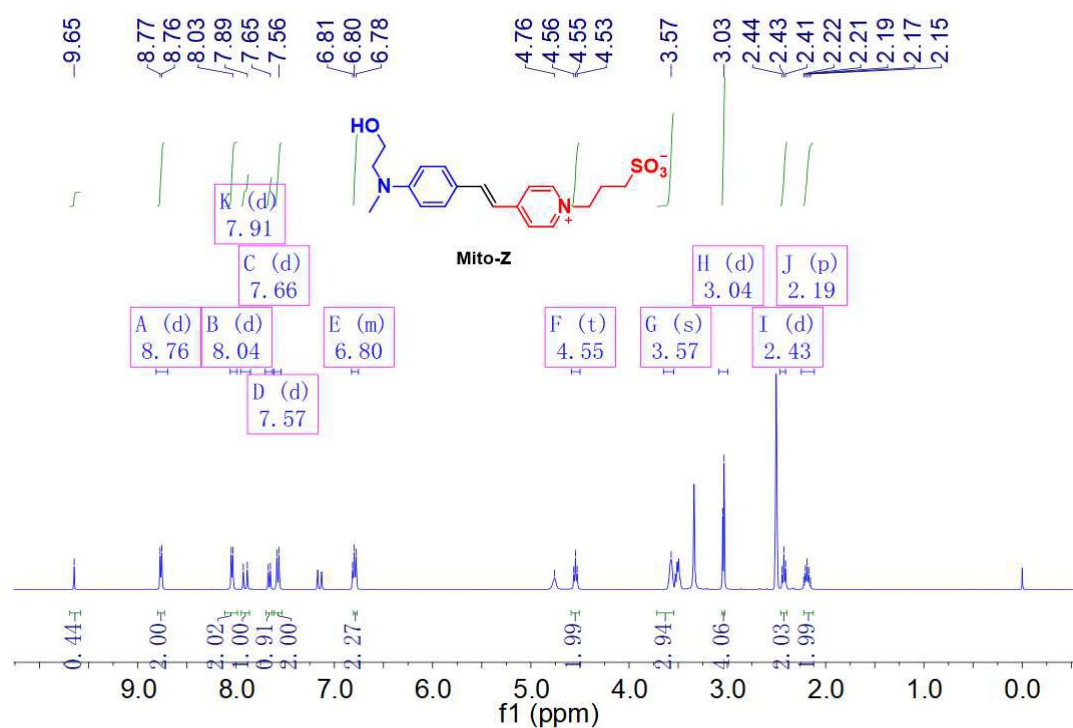

Figure S22. <sup>1</sup>H NMR spectrum of Mito-Z (400 MHz, 298 K, d<sub>6</sub>-DMSO).

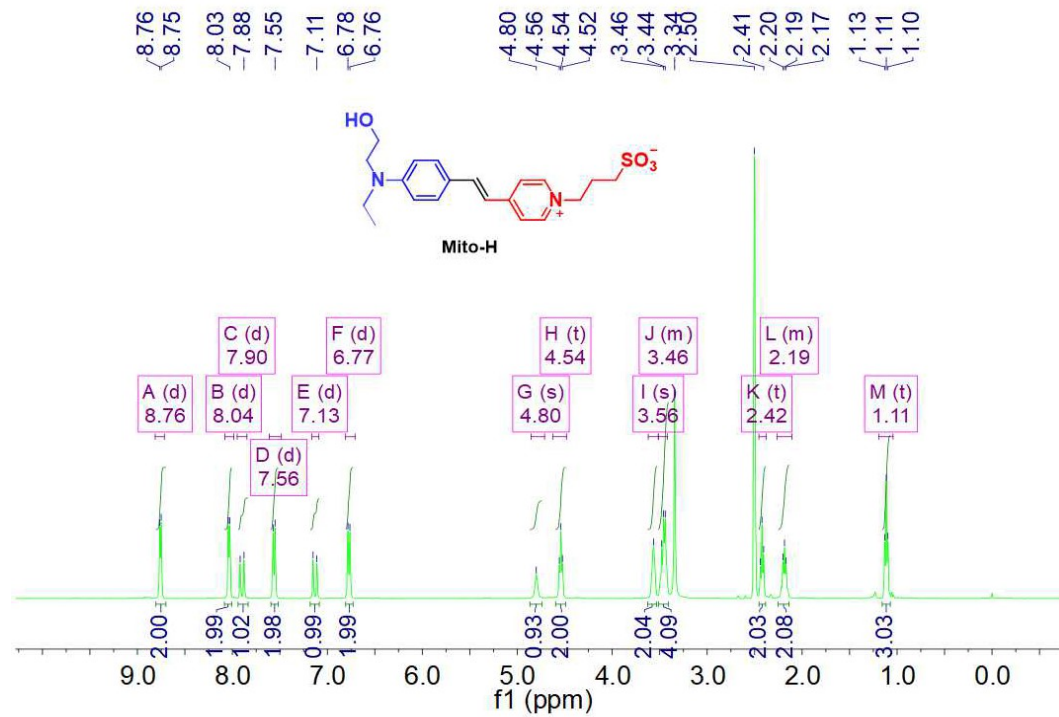

**Figure S23.**  $^1\text{H}$  NMR spectrum of **Mito-H** (400 MHz, 298 K,  $d_6$ -DMSO).

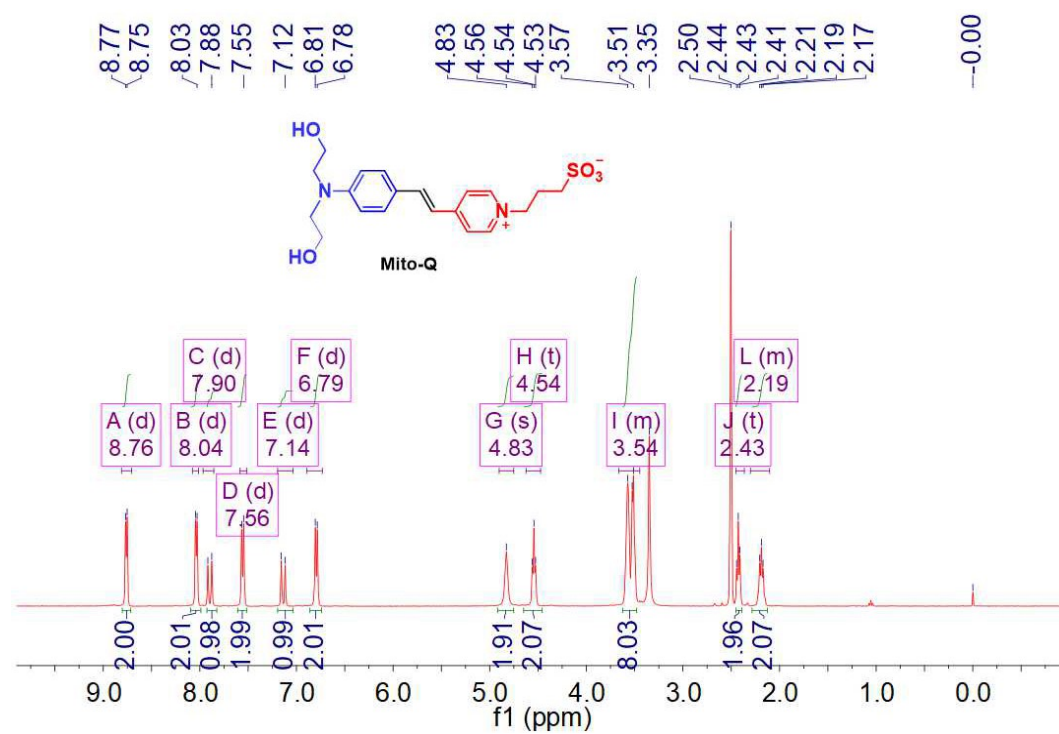

**Figure S24.**  $^1\text{H}$  NMR spectrum of **Mito-Q** (400 MHz, 298 K,  $d_6$ -DMSO).

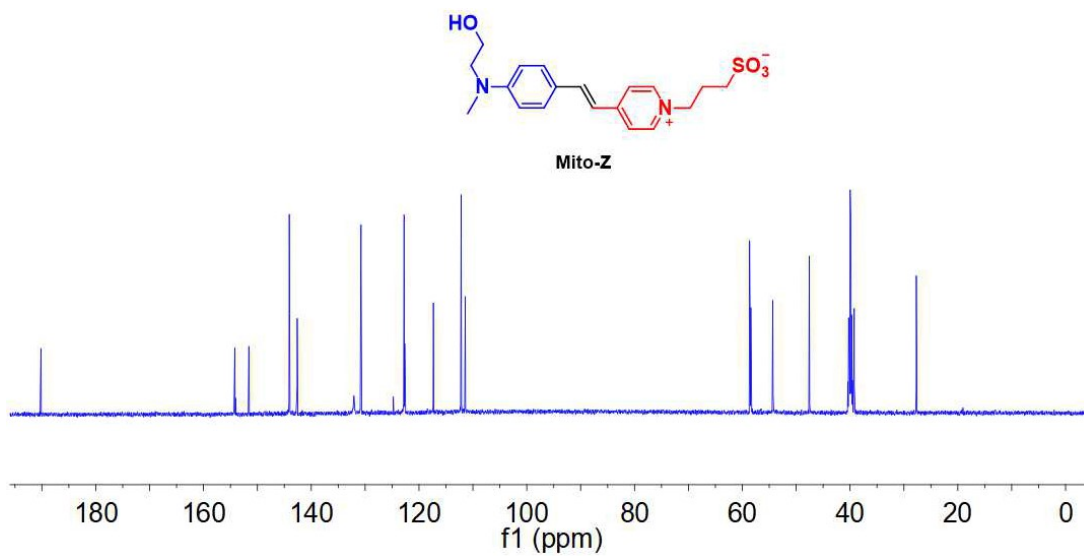

**Figure S25.** <sup>13</sup>C NMR spectrum of **Mito-Z** (100 MHz, 298 K, *d*<sub>6</sub>-DMSO).

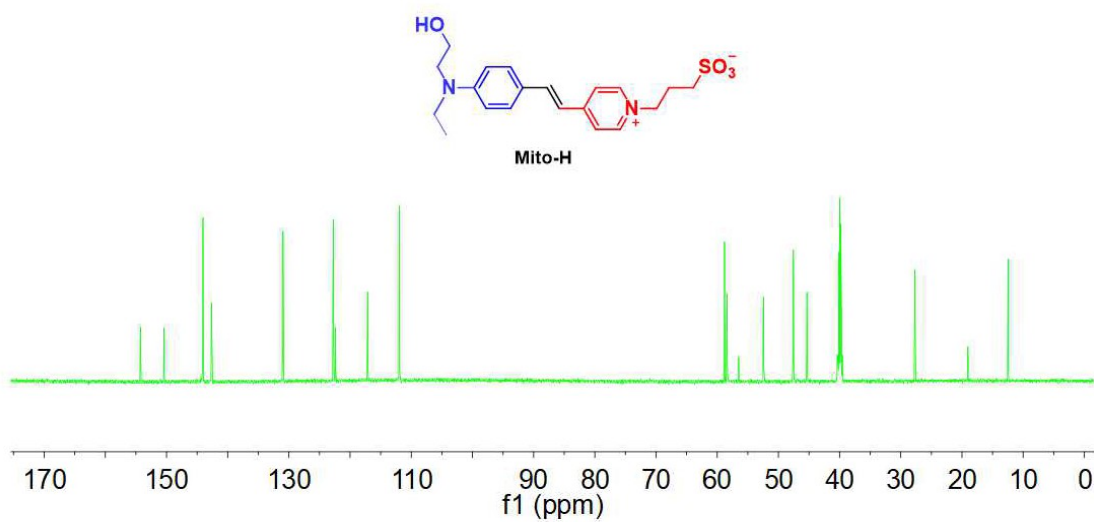

**Figure S26.** <sup>13</sup>C NMR spectrum of **Mito-H** (100 MHz, 298 K, *d*<sub>6</sub>-DMSO).

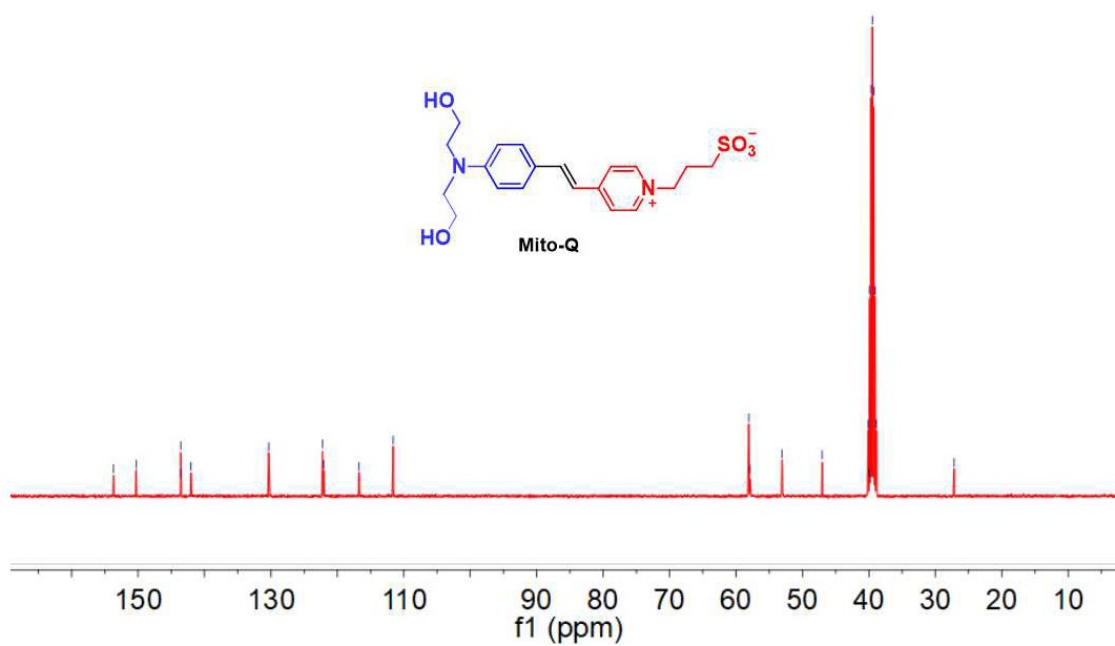

Figure S27. <sup>13</sup>C NMR spectrum of Mito-Q (100 MHz, 298 K, *d*<sub>6</sub>-DMSO).

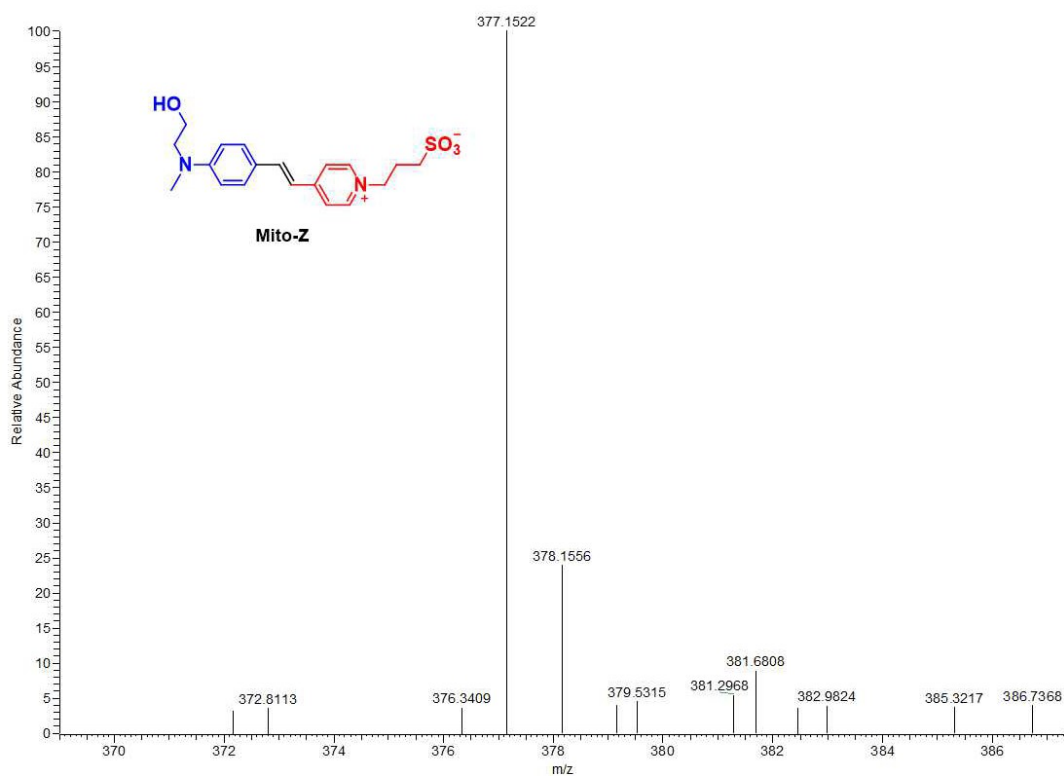

Figure S28. HR-MS spectrum of Mito-Z.

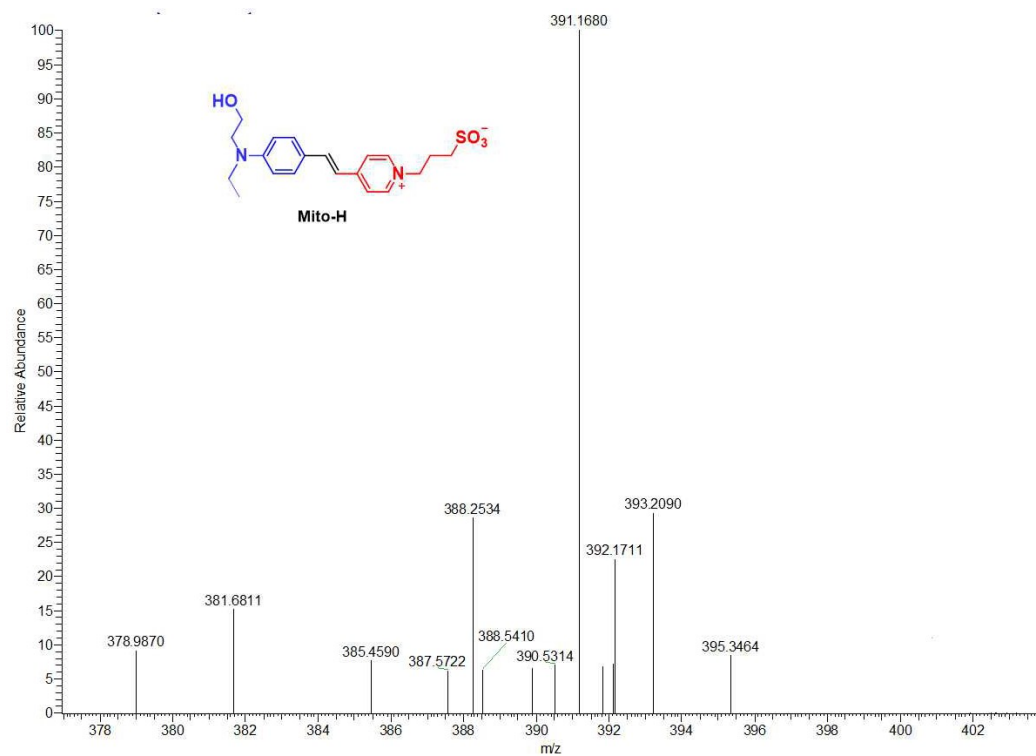

Figure S29. HR-MS spectrum of Mito-H.

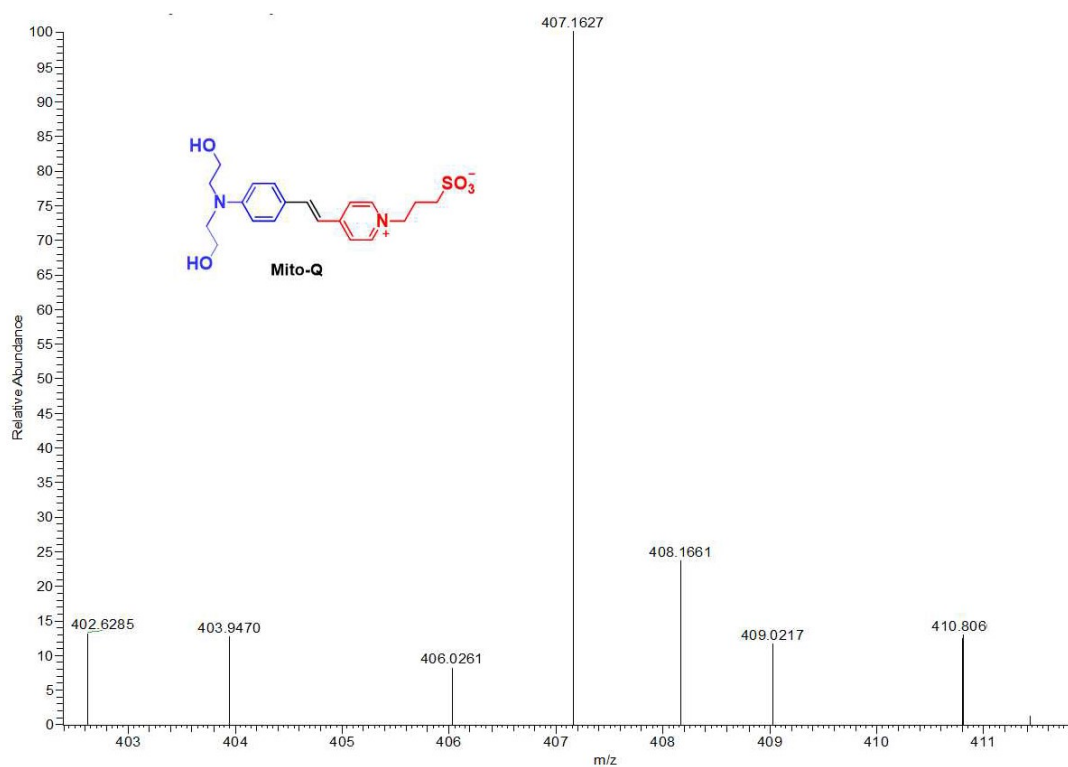

Figure S30. HR-MS spectrum of Mito-Q.



## Supporting Tables

**Table S1.** Crystal data and structure refinement for **Mito-Q**.

|                                                      |                                                                                   |
|------------------------------------------------------|-----------------------------------------------------------------------------------|
| Compound                                             | <b>Mito-Q</b>                                                                     |
| Empirical formula                                    | C <sub>20</sub> H <sub>26</sub> N <sub>2</sub> O <sub>5</sub> S, H <sub>2</sub> O |
| Formula weight                                       | 424.50                                                                            |
| Temperature                                          | 296(2) K                                                                          |
| Wavelength                                           | 0.71073 Å                                                                         |
| space group                                          | <i>P</i> 2 <sub>1</sub> / <i>n</i>                                                |
| Crystal system                                       | monoclinic                                                                        |
| <i>a</i> /Å                                          | 17.617(5)                                                                         |
| <i>b</i> /Å                                          | 13.441(5)                                                                         |
| <i>c</i> /Å                                          | 8.825(3)                                                                          |
| $\beta$ (°)                                          | 100.752(4)                                                                        |
| <i>V</i> /Å <sup>3</sup>                             | 2053.0(12)                                                                        |
| <i>Z</i>                                             | 4                                                                                 |
| <i>D<sub>c</sub></i> /Mg m <sup>-3</sup>             | 1.373                                                                             |
| $\mu$ /mm <sup>-1</sup>                              | 0.198                                                                             |
| F(000)                                               | 904                                                                               |
| Final R indices [ <i>I</i> >2 $\sigma$ ( <i>I</i> )] | R <sub>1</sub> = 0.0488,<br>wR <sub>2</sub> = 0.1563                              |
| Goodness-of-fit on F <sup>2</sup>                    | 1.091                                                                             |

**Table S2.** Photophysical data of the target compounds in different solvents.

| <b>Mito-Z</b> |                                      |                                      |                           |                             |                       |                                                 |
|---------------|--------------------------------------|--------------------------------------|---------------------------|-----------------------------|-----------------------|-------------------------------------------------|
| Solvents      | $\lambda_{\text{ex}}$ <sup>[a]</sup> | $\lambda_{\text{em}}$ <sup>[b]</sup> | $\Delta V$ <sup>[c]</sup> | Log $\epsilon_{\text{max}}$ | $\Phi$ <sup>[d]</sup> | Brightness<br>( $\epsilon\Phi$ ) <sup>[e]</sup> |
| PBS           | 466                                  | 600                                  | 134                       | 2.13                        | 0.012                 | 0.026                                           |
| DMSO          | 485                                  | 606                                  | 121                       | 2.08                        | 0.018                 | 0.037                                           |
| ACN           | 476                                  | 600                                  | 124                       | 2.09                        | 0.014                 | 0.029                                           |
| EtOH          | 485                                  | 594                                  | 109                       | 2.04                        | 0.026                 | 0.053                                           |
| THF           | 480                                  | 595                                  | 115                       | 2.06                        | 0.015                 | 0.031                                           |
| EA            | 465                                  | 589                                  | 124                       | 2.09                        | 0.010                 | 0.021                                           |

| Mito-H   |                      |                      |                  |                                   |              |                                              |
|----------|----------------------|----------------------|------------------|-----------------------------------|--------------|----------------------------------------------|
| Solvents | $\lambda_{ex}^{[a]}$ | $\lambda_{em}^{[b]}$ | $\Delta V^{[c]}$ | $\text{Log}\epsilon^{\text{max}}$ | $\Phi^{[d]}$ | Brightness ( $\epsilon\Phi$ ) <sup>[e]</sup> |
| PBS      | 472                  | 597                  | 125              | 3.88                              | 0.016        | 0.062                                        |
| DMSO     | 485                  | 609                  | 124              | 3.94                              | 0.023        | 0.091                                        |
| ACN      | 479                  | 601                  | 122              | 4.03                              | 0.018        | 0.073                                        |
| EtOH     | 490                  | 595                  | 105              | 3.99                              | 0.034        | 0.136                                        |
| THF      | 482                  | 593                  | 111              | 3.85                              | 0.019        | 0.073                                        |
| EA       | 468                  | 580                  | 112              | 3.72                              | 0.012        | 0.045                                        |

  

| Mito-Q   |                      |                      |                  |                                   |              |                                              |
|----------|----------------------|----------------------|------------------|-----------------------------------|--------------|----------------------------------------------|
| Solvents | $\lambda_{ex}^{[a]}$ | $\lambda_{em}^{[b]}$ | $\Delta V^{[c]}$ | $\text{Log}\epsilon^{\text{max}}$ | $\Phi^{[d]}$ | Brightness ( $\epsilon\Phi$ ) <sup>[e]</sup> |
| PBS      | 464                  | 593                  | 129              | 3.88                              | 0.019        | 0.074                                        |
| DMSO     | 485                  | 606                  | 121              | 3.93                              | 0.032        | 0.126                                        |
| ACN      | 475                  | 598                  | 123              | 3.92                              | 0.022        | 0.086                                        |
| EtOH     | 484                  | 595                  | 111              | 3.97                              | 0.042        | 0.167                                        |
| THF      | 486                  | 595                  | 109              | 3.46                              | 0.021        | 0.073                                        |
| EA       | 472                  | 595                  | 123              | 3.70                              | 0.013        | 0.048                                        |

<sup>[a]</sup>Peak position of the longest absorption band in nm. <sup>[b]</sup>Peak position of SPEF, excited at the absorption maximum in nm. <sup>[c]</sup>Stokes' shift in nm. <sup>[d]</sup>Quantum yields determined by using rhodamine (RhB) as standard. <sup>[e]</sup>Brightness( $\epsilon\Phi$ ) is proportional to the product of the extinction coefficient ( $\epsilon$ , at the relevant excitation wavelength,  $10^4$ ) and the fluorescence quantum yield ( $\Phi$ ).

**Table S3.** Calculated linear absorption properties (nm), excitation energy (eV), oscillator strengths and major contribution for the target compounds .

| Cmpds         | $\lambda$ (nm) | E(ev) | $f$     | Composition          | Character |
|---------------|----------------|-------|---------|----------------------|-----------|
| <b>Mito-Z</b> | 486            | 2.55  | 0.01455 | 100→101 (H→L) (0.64) | ICT       |
| <b>Mito-H</b> | 490            | 2.53  | 0.01575 | 104→105 (H→L) (0.64) | ICT       |
| <b>Mito-Q</b> | 484            | 2.56  | 0.01836 | 108→109 (H→L) (0.64) | ICT       |

**Table S4.** The reported structurally similar probes and their sensing properties

| Structures                                                                                                                                                                 | Targeting     | Comments                                                                            | Ref.                       |
|----------------------------------------------------------------------------------------------------------------------------------------------------------------------------|---------------|-------------------------------------------------------------------------------------|----------------------------|
| 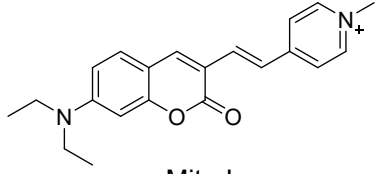 <p>Mito-Lyso</p>                                                                         | Mitochondria  | Indicator of mitochondrial membrane potential (MPP)                                 | 2018 Anal. Chem.           |
|  <p>mNVP-B: R=-OAc;<br/>mNVP-G: R=-OMe;<br/>mNVP-R: R=-N(CH<sub>2</sub>)<sub>4</sub>.</p> | Cell Membrane | Fluorescence trackers for the outer cell membrane                                   | 2020 ACS Appl. Bio Mater.  |
|  <p>QCD-B</p>                                                                           | Mitochondria  | Reveal Mitochondrial Nucleoprotein Dynamics with Reactive Oxygen Species Regulation | 2020 Angew. Chem. Int. Ed. |
|  <p>PTPE</p>                                                                            | Mitochondria  | Autophagy Modulators for Cancer Therapy                                             | 2020 Angew. Chem. Int. Ed. |
|  <p>ASCP-SO</p>                                                                         | Mitochondria  | Visually for mitochondria uptake and retention                                      | 2020 Chem. Commun.         |

|                                                                                                           |                            |                                                                                    |                              |
|-----------------------------------------------------------------------------------------------------------|----------------------------|------------------------------------------------------------------------------------|------------------------------|
| 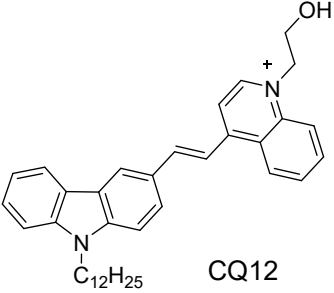 <p>CQ12</p>             | Cell Membrane              | Visually Discriminating Near-Zero and Normal Situations of Cell Membrane Potential | 2021 Anal. Chem.             |
|  <p>Car-py</p>           | Cell Membrane              | Visually plasma membranes                                                          | 2021 Sens. Actuators B Chem. |
|  <p>Diphenylthio ER1</p> | Endoplasmic Reticulum (ER) | inducing cellular stress and mitochondria-mediated apoptosis in cancer cells       | 2018 J. Mater. Chem. B       |
|  <p>ECPI-12</p>        | Mitochondria               | long-term mitochondria visualization and tracking                                  | 2018 Chem. Sci.              |
|  <p>TVP</p>            | Cell Membrane              | Visually plasma membranes                                                          | 2019 Mater. Horiz.           |
|  <p>DBF</p>            | Nucleic acid               | Fluorescence imaging of the viscosity of live cells and tissues                    | 2016 Chem. Sci.              |
|  <p>MeTTPy</p>         | Mitochondria               | Fluorescence-imaging-guided photodynamic therapy                                   | 2018 Adv. Mater.             |

|                                                                                                 |              |                                                                 |                        |
|-------------------------------------------------------------------------------------------------|--------------|-----------------------------------------------------------------|------------------------|
| 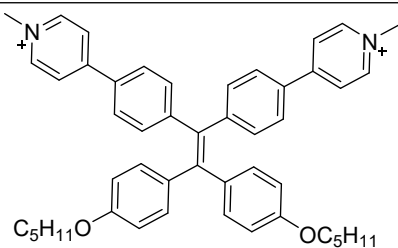 <p>TPE-OM</p> | Mitochondria | Photodynamic therapy                                            | 2020<br>J.Am.Chem.Soc. |
|  <p>Mito-Q</p> | Mitochondria | Two-photon fluorescence<br>imaging of mitochondria<br>viscosity | This Work              |

## Commands for theoretical calculation of target molecules

### Mito-Z:

%nproc=6

%chk=1.chk

%mem=6000MB

# opt b3lyp/6-31g scf=xqc

Mito-Z

0 1

|   |             |             |             |
|---|-------------|-------------|-------------|
| C | 6.99749400  | 1.03942200  | -0.24319600 |
| H | 7.14286300  | 1.58666100  | 0.54415300  |
| H | 7.38224600  | 1.50740800  | -1.00064500 |
| C | 5.49930900  | 0.90221700  | -0.46891200 |
| H | 5.13268000  | 1.77529300  | -0.67817800 |
| H | 5.34952000  | 0.32809500  | -1.23541800 |
| C | 4.76089500  | 0.33220900  | 0.72250100  |
| H | 5.10358300  | -0.55262500 | 0.92096700  |
| H | 4.91490100  | 0.89524900  | 1.49678500  |
| C | 2.45245900  | 1.13465700  | 1.00759800  |
| H | 2.78118800  | 1.79651600  | 1.57318900  |
| C | 1.11293900  | 1.07247400  | 0.74968400  |
| H | 0.54337500  | 1.69892600  | 1.13371200  |
| C | 0.58345900  | 0.07878700  | -0.08709500 |
| C | 1.50565500  | -0.80735100 | -0.64984300 |
| H | 1.20792100  | -1.47403800 | -1.22587100 |
| C | 2.83194800  | -0.70818000 | -0.36958800 |
| H | 3.42502900  | -1.31342000 | -0.75269700 |
| C | -0.83329400 | -0.08266900 | -0.35370200 |

|   |             |             |             |
|---|-------------|-------------|-------------|
| H | -1.10118600 | -0.86307900 | -0.78462600 |
| C | -1.78127500 | 0.79488500  | -0.03191000 |
| H | -1.49232000 | 1.59339800  | 0.34647600  |
| C | -3.21553900 | 0.64297400  | -0.20477400 |
| C | -4.06413800 | 1.72444000  | 0.00929400  |
| H | -3.69101600 | 2.54743800  | 0.23291000  |
| C | -5.43093100 | 1.62601100  | -0.09635900 |
| H | -5.95479200 | 2.38406200  | 0.02732200  |
| C | -6.04886300 | 0.40084200  | -0.38699600 |
| C | -5.19179100 | -0.69475300 | -0.61149800 |
| H | -5.55954000 | -1.52172900 | -0.82199900 |
| C | -3.83137800 | -0.57173400 | -0.52812700 |
| H | -3.30056700 | -1.31726500 | -0.69106000 |
| C | -8.29660500 | 1.41302600  | -0.28363900 |
| H | -7.94268000 | 1.99930200  | 0.40383000  |
| H | -9.16986800 | 1.10711000  | 0.00822400  |
| C | -8.03721400 | -1.04306500 | -0.66131500 |
| H | -7.56824900 | -1.48543600 | -1.38540500 |
| H | -8.95422600 | -0.90624900 | -0.94367600 |
| C | -8.02887100 | -1.94638500 | 0.54789400  |
| H | -8.32659400 | -2.82968000 | 0.27810600  |
| H | -7.11655300 | -2.02859300 | 0.86756600  |
| N | 3.30511800  | 0.25005300  | 0.45240300  |
| N | -7.41574900 | 0.26264700  | -0.42314400 |
| O | 7.36555000  | -1.37622300 | -1.07394200 |
| O | 7.50541100  | -0.98895400 | 1.28862000  |
| O | 9.26232900  | -0.20335300 | -0.16976700 |
| O | -8.84532100 | -1.50013700 | 1.61775300  |
| H | -9.61158700 | -1.76867600 | 1.50647800  |

|   |             |             |             |
|---|-------------|-------------|-------------|
| S | 7.86122600  | -0.50089800 | -0.03097400 |
| H | -8.40862700 | 1.96928900  | -1.19079000 |

--link1--

%nproc=6

%chk=1.chk

%mem=6000MB

# td=(singlets,nstates=50,root=1) b3lyp/6-31g(d) scf=xqc guess=read geom=allcheck

### Mioto-H:

%nproc=6

%chk=1.chk

%mem=6000MB

# opt b3lyp/6-31g scf=xqc

Mioto-H

0 1

|   |             |             |             |
|---|-------------|-------------|-------------|
| C | -7.29981100 | -1.12809100 | -0.09328900 |
| H | -7.44572800 | -1.53696000 | 0.77392200  |
| H | -7.66424100 | -1.72605000 | -0.76441500 |
| C | -5.80151700 | -0.99834100 | -0.32266100 |
| H | -5.41472700 | -1.88600900 | -0.37660500 |
| H | -5.65201400 | -0.55935400 | -1.17385000 |
| C | -5.09182900 | -0.21852900 | 0.76263400  |
| H | -5.45476100 | 0.67941800  | 0.80420000  |
| H | -5.24587900 | -0.64536900 | 1.61956100  |
| C | -2.77236600 | -0.91022500 | 1.20504400  |
| H | -3.09611400 | -1.47364500 | 1.87119600  |



|   |             |             |             |
|---|-------------|-------------|-------------|
| C | -1.43074200 | -0.86332900 | 0.95495300  |
| H | -0.85453700 | -1.40295900 | 1.44598300  |
| C | -0.90893000 | -0.01454700 | -0.03259200 |
| C | -1.84020200 | 0.74291400  | -0.74768400 |
| H | -1.54738400 | 1.30864100  | -1.42527900 |
| C | -3.16819600 | 0.66365100  | -0.46915200 |
| H | -3.76750500 | 1.18202300  | -0.95593000 |
| C | 0.50807000  | 0.13038000  | -0.30726400 |
| H | 0.76670800  | 0.83210500  | -0.86151100 |
| C | 1.46843700  | -0.65891500 | 0.16921000  |
| H | 1.18986000  | -1.38784600 | 0.67452900  |
| C | 2.90177500  | -0.50711400 | -0.01127600 |
| C | 3.76837700  | -1.51776000 | 0.39259100  |
| H | 3.40838100  | -2.29890300 | 0.74863600  |
| C | 5.13434500  | -1.40873600 | 0.28668300  |
| H | 5.67122900  | -2.12317300 | 0.54301200  |
| C | 5.73210500  | -0.23734100 | -0.20103200 |
| C | 4.85690500  | 0.78527200  | -0.61767200 |
| H | 5.21126000  | 1.57244000  | -0.96152800 |
| C | 3.49812200  | 0.64838200  | -0.52947400 |
| H | 2.95510600  | 1.34367500  | -0.82243300 |
| C | 7.99766500  | -1.16783100 | 0.09724400  |
| H | 7.64547200  | -1.63666800 | 0.87038600  |
| H | 8.86040000  | -0.79779200 | 0.34243100  |
| C | 8.18912500  | -2.15171000 | -1.02561600 |
| H | 7.33355700  | -2.41494500 | -1.36983000 |
| H | 8.65397000  | -2.92564300 | -0.69685000 |
| H | 8.70394400  | -1.74352500 | -1.72495900 |

|   |             |             |             |
|---|-------------|-------------|-------------|
| C | 7.69531800  | 1.18237600  | -0.69485500 |
| H | 7.22824000  | 1.48518000  | -1.48862700 |
| H | 8.61884400  | 1.01979700  | -0.93985300 |
| C | 7.65163200  | 2.27724100  | 0.34322200  |
| H | 7.93572900  | 3.10831300  | -0.06938500 |
| H | 6.73333700  | 2.39244500  | 0.63431200  |
| N | -3.63420000 | -0.15147000 | 0.49841400  |
| N | 7.09637600  | -0.07735000 | -0.24520200 |
| O | -7.70343400 | 1.10306200  | -1.32616700 |
| O | -7.86980800 | 1.11901700  | 1.06617500  |
| O | -9.58957200 | 0.05919500  | -0.25670400 |
| O | 8.46116200  | 2.03686100  | 1.48217100  |
| H | 9.22350600  | 2.29937400  | 1.33527900  |
| S | -8.19677400 | 0.40660200  | -0.15517200 |

--link1--

%nproc=6

%chk=1.chk

%mem=6000MB

# td=(singlets,nstates=50,root=1) b3lyp/6-31g(d) scf=xqc guess=read geom=allcheck

**Mito-Q:**

%nproc=8

%chk=1.chk

%mem=8000MB

# opt td(singlets,nstates=6,root=1) b3lyp/6-31g

Mito-Q

0 1

|   |             |             |             |
|---|-------------|-------------|-------------|
| C | 7.93355600  | -2.08929900 | 0.44455400  |
| H | 7.08766900  | -2.48349600 | 0.70844700  |
| H | 8.42566700  | -2.75758700 | -0.05849700 |
| C | 7.66249400  | -0.91046400 | -0.45150500 |
| H | 8.50420000  | -0.47561400 | -0.65555600 |
| H | 7.28967700  | -1.23451700 | -1.28640900 |
| C | 7.22001300  | 2.50996700  | -0.17986300 |
| H | 6.29790700  | 2.61898000  | -0.45719500 |
| H | 7.46894100  | 3.29354200  | 0.33462600  |
| C | 7.32586700  | 1.29638800  | 0.69781200  |
| H | 8.26154300  | 1.13598000  | 0.89702900  |
| H | 6.87390700  | 1.47817500  | 1.53652900  |
| C | 5.39407900  | -0.10378700 | 0.05894400  |
| C | 4.51101000  | 0.81479100  | 0.65600100  |
| H | 4.85827700  | 1.53442300  | 1.13350100  |
| C | 3.15394800  | 0.67381400  | 0.55049300  |
| H | 2.60074000  | 1.30082700  | 0.95568400  |
| C | 2.57560000  | -0.39465900 | -0.15369100 |
| C | 3.44914100  | -1.32351900 | -0.71491600 |
| H | 3.09780400  | -2.04870500 | -1.17852200 |
| C | 4.81316200  | -1.20184000 | -0.60721300 |
| H | 5.36156900  | -1.85435500 | -0.97865400 |
| C | 1.13952000  | -0.53451000 | -0.34113700 |
| H | 0.86646900  | -1.19462600 | -0.93606100 |
| C | 0.17013400  | 0.16922300  | 0.23861100  |
| H | 0.42205700  | 0.79747700  | 0.87586700  |
| C | -1.24257200 | 0.03865400  | -0.04026900 |

|   |             |             |             |
|---|-------------|-------------|-------------|
| C | -1.75870200 | -0.70697400 | -1.11040400 |
| H | -1.17763300 | -1.17432100 | -1.66608600 |
| C | -3.10813100 | -0.75576700 | -1.34872300 |
| H | -3.43033900 | -1.24867600 | -2.06831700 |
| C | -3.50747300 | 0.62281500  | 0.49020400  |
| H | -4.11050000 | 1.07635800  | 1.03461100  |
| C | -2.18255300 | 0.69842500  | 0.75756300  |
| H | -1.89130700 | 1.19834800  | 1.48560400  |
| C | -5.43768400 | -0.15885400 | -0.80486200 |
| H | -5.59886500 | -0.46048400 | -1.71215900 |
| H | -5.81735800 | 0.72888300  | -0.71080100 |
| C | -6.11667800 | -1.10228400 | 0.16797800  |
| H | -5.93831400 | -0.80366000 | 1.07292200  |
| H | -5.73192300 | -1.98692300 | 0.06786100  |
| C | -7.62133200 | -1.19264600 | -0.03415000 |
| H | -7.97068300 | -1.88726000 | 0.54566500  |
| H | -7.79620400 | -1.45899700 | -0.95030200 |
| N | 6.75448900  | 0.07616900  | 0.10906200  |
| N | -3.96979700 | -0.09912800 | -0.55347200 |
| O | -8.21672700 | 1.21049000  | -0.80827100 |
| O | -7.96062000 | 0.83137900  | 1.54135900  |
| O | -9.89817600 | -0.02936800 | 0.40053800  |
| S | -8.49554000 | 0.31674900  | 0.29722900  |
| O | 8.04287400  | 2.43497700  | -1.33376100 |
| H | 7.77091100  | 2.96460200  | -1.89828800 |
| O | 8.66406800  | -1.76461800 | 1.60267000  |
| H | 9.41984600  | -1.52536100 | 1.39085900  |

## References:

1. M. J. Frisch, G. W. Trucks, H. B. Schlegel, et al., Gaussian 09, Revision D.01, Gaussian, Inc., Wallingford CT, 2013.
2. A. D. Becke, Density-functional thermochemistry. III. The role of exactexchange, *J. Chem. Phys.*, 1993, **98**, 5648-5652.
3. T. G. Gray, C. M Rudzinski, E. E. Meyer, R. H. Holm, D. G. Nocera, Spectroscopic and photophysical properties of hexanuclear rhenium(III) chalcogenide clusters. *J Am. Chem. Soc.*, 2003, **125**, 4755-4770.
